# Supplementary material for: Dehydration of methanol and ethanol over ferrierite originated layered zeolites – the role of acidity and porous structure
Source: Royal Society of Chemistry journal article supplement (doi:10.1039/d2ra00334a), 2022-01-01
Supplement: d2ra00334a1.pdf [file d2ra00334a1.pdf]

## Dehydration of methanol and ethanol over ferrierite originated layered zeolites – the role of acidity and porous structure

Aneta Świąś,<sup>a</sup> Andrzej Kowalczyk,<sup>a</sup> Barbara Gil<sup>a</sup> and Lucjan Chmielarz\*<sup>a</sup>

<sup>a</sup> Jagiellonian University in Kraków, Faculty of Chemistry, Gronostajowa 2, 30-387 Kraków, Poland

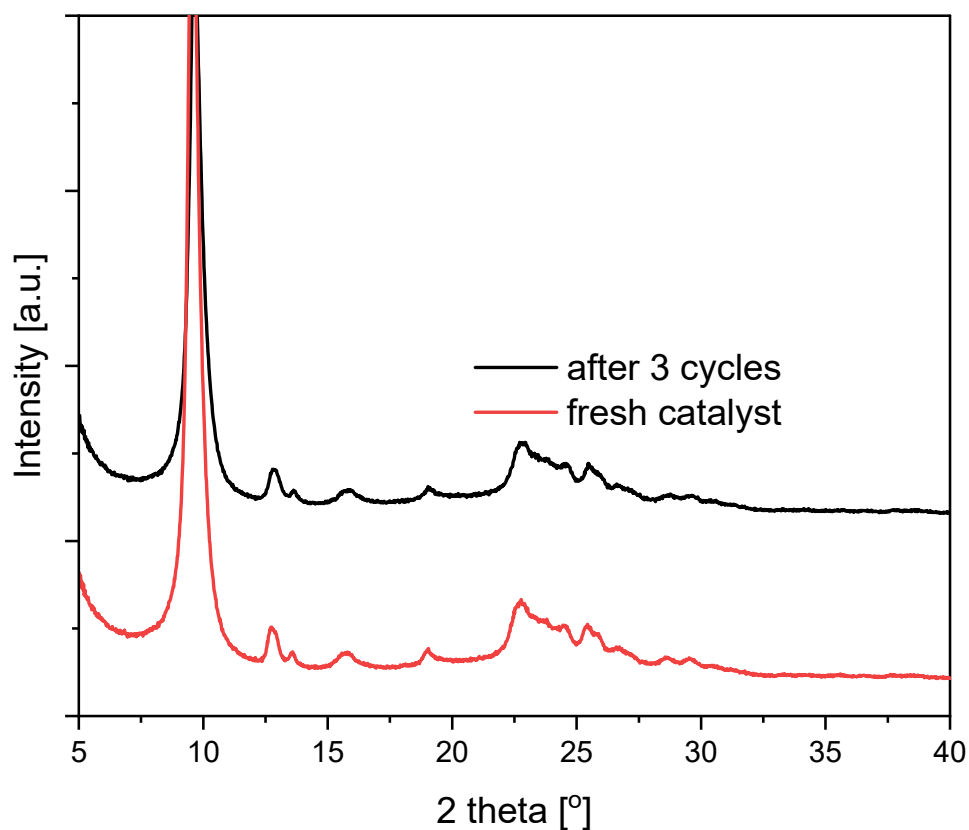

Fig. S1. X-ray diffractograms of fresh and used (after 3 catalytic runs) ITQ-6\_30 sample. D2 PHASER powder diffractometer (Bruker, Billerica, MA, USA), diffractograms were taken in the  $2\theta$  range of 2-40 with a step of  $0.02^\circ$  and a counting time of 1 s per step.
